# Supplementary material for: Scalable fabrication of a large-area lithium/graphene anode towards a long-life 350 W h kg−1 lithium metal pouch cell
Source: Royal Society of Chemistry journal article supplement (doi:10.1039/d1ta07660d), 2021-01-01
Supplement: d1ta07660d1.pdf [file d1ta07660d1.pdf]

## Supporting Information

### Scalable Fabrication of Large-area Lithium/Graphene Anode towards Long-life 350 Wh kg<sup>-1</sup> Lithium Metal Pouch Cell

*Bangyi He*<sup>a, c, #</sup>, *Wei Deng*<sup>a, #</sup>, *Qigao Han*<sup>a</sup>, *Wenhua Zhu*<sup>a</sup>, *Zhiyuan Hu*<sup>a</sup>, *Wei Fang*<sup>a</sup>,  
*Xufeng Zhou*<sup>\*, a, b</sup> and *Zhaoping Liu*<sup>\*, a, b</sup>

a Key Laboratory of Graphene Technologies and Applications of Zhejiang Province and Advanced Li-ion Battery Engineering Laboratory of Zhejiang Province, Ningbo Institute of Materials Technology & Engineering, Chinese Academy of Sciences, Zhejiang 315201, P. R. China

b Center of Materials Science and Optoelectronics Engineering, University of Chinese Academy of Sciences, Beijing 100049, P. R. China

c Department of Materials Science and Engineering, Shanghai University, Shanghai 200444, P. R. China

# These authors contribute equally to this work.

\* Corresponding authors. Tel./Fax: +86-574-8668-5096.

E-mail address: [zhouxf@nimte.ac.cn](mailto:zhouxf@nimte.ac.cn), [liuzp@nimte.ac.cn](mailto:liuzp@nimte.ac.cn)

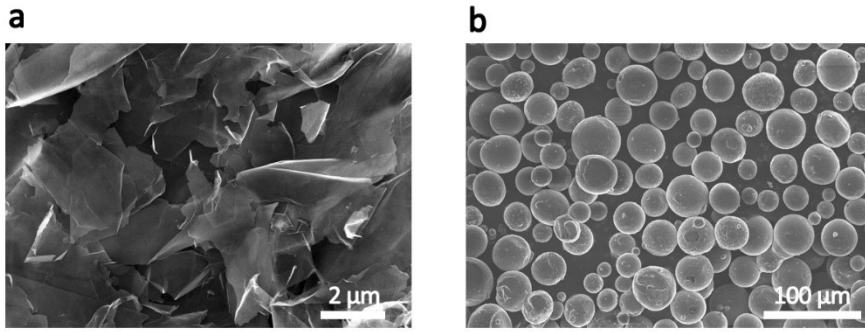

**Figure S1.** SEM images of (a) graphene flakes and (b) lithium powders.

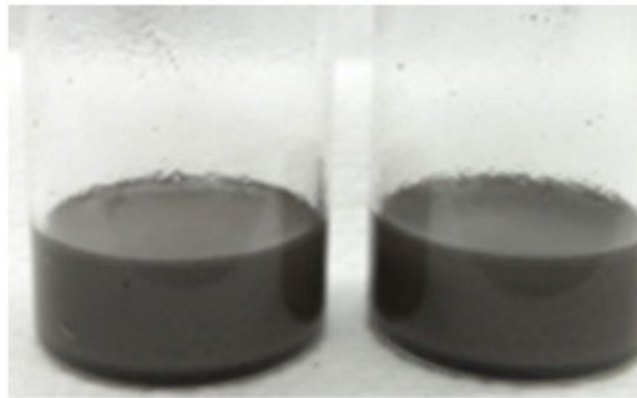

**Figure S2.** Optical photograph of LP/G/PVDF/NMP slurry.

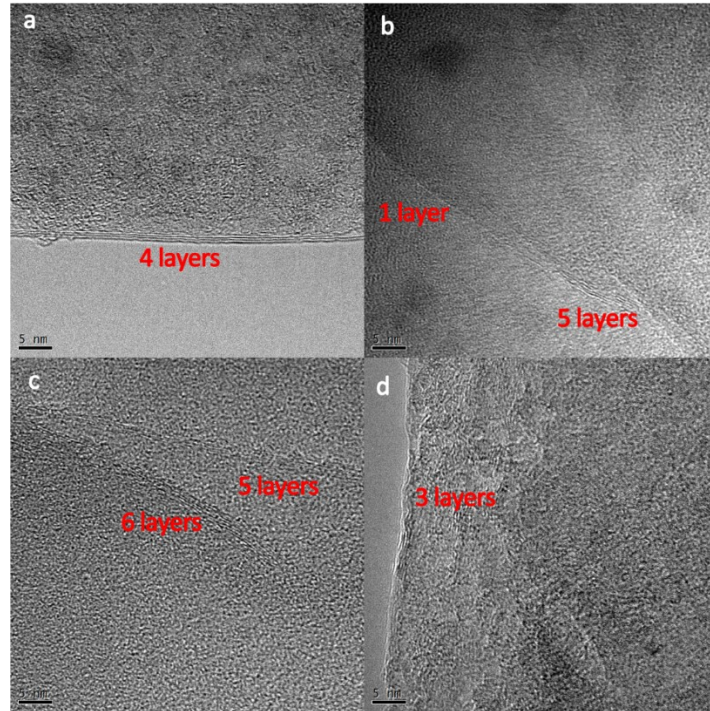

**Figure S3.** TEM images of multi-layer graphene sample used in our experiment.

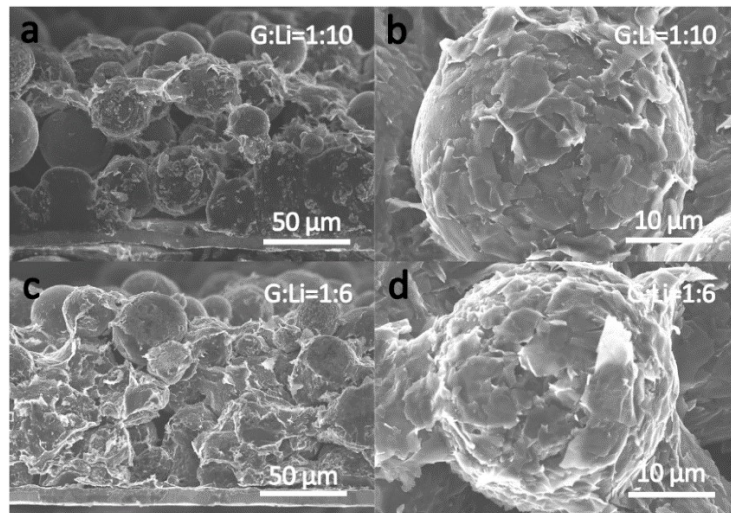

**Figure S4.** SEM images of the morphology of the Li/G composite before thermal conversion with different graphene to lithium mass ratios of 1:10 (a, b) and 1:6 (c, d).

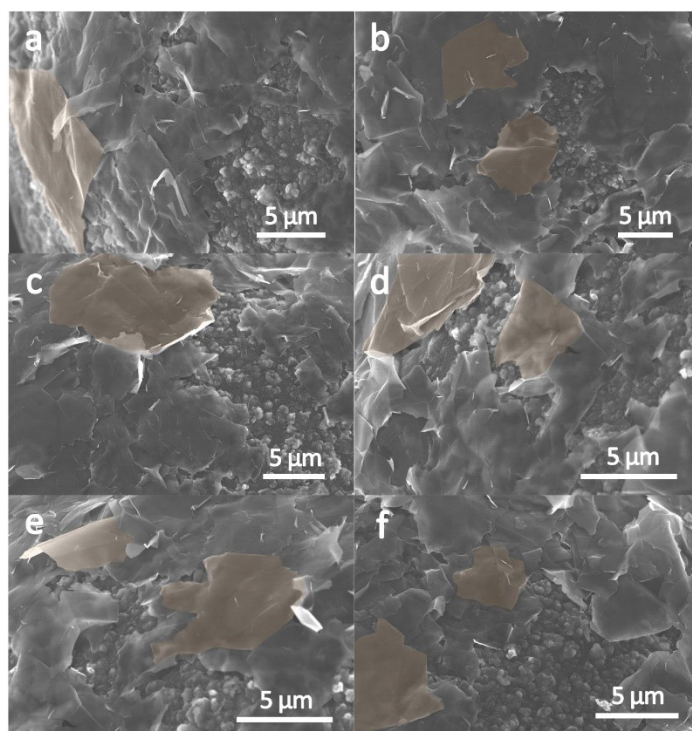

**Figure S5.** Magnified SEM image of graphene wrapped Li powder in the Li/G composite with the graphene to lithium mass ratio of 1:8.

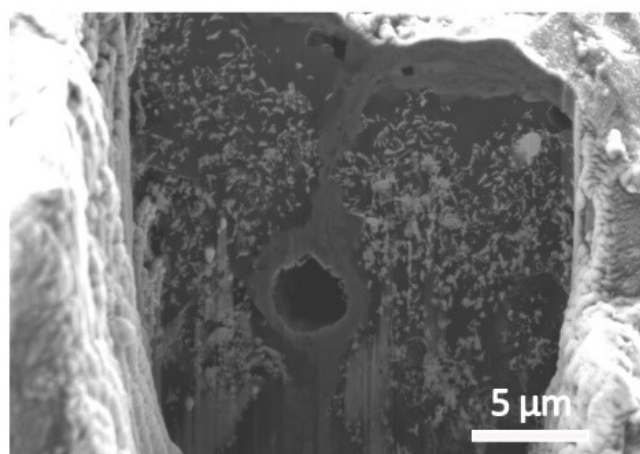

**Figure S6.** Original SEM image of Figure 1j.

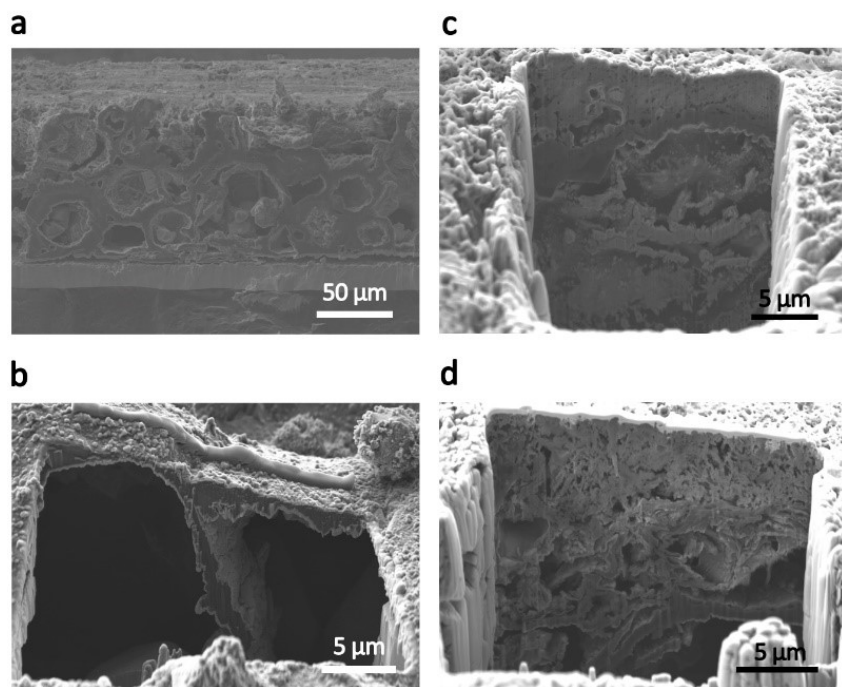

**Figure S7.** Original SEM images of Figure 2a-d.

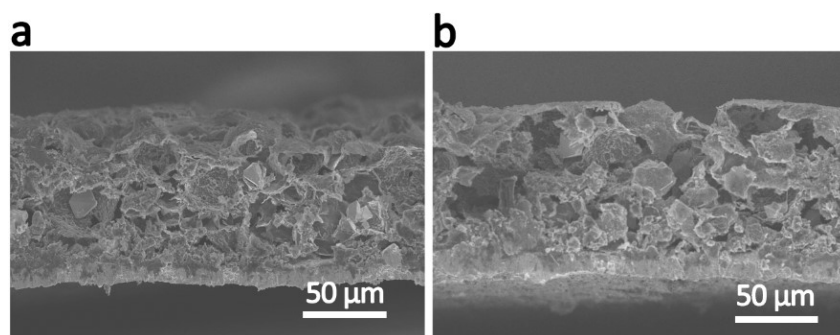

**Figure S8.** (a, b) Cross-sectional SEM image of the  $\text{LiC}_6$  skeleton in the  $\text{Li@G}$  anode after removal of lithium metal.



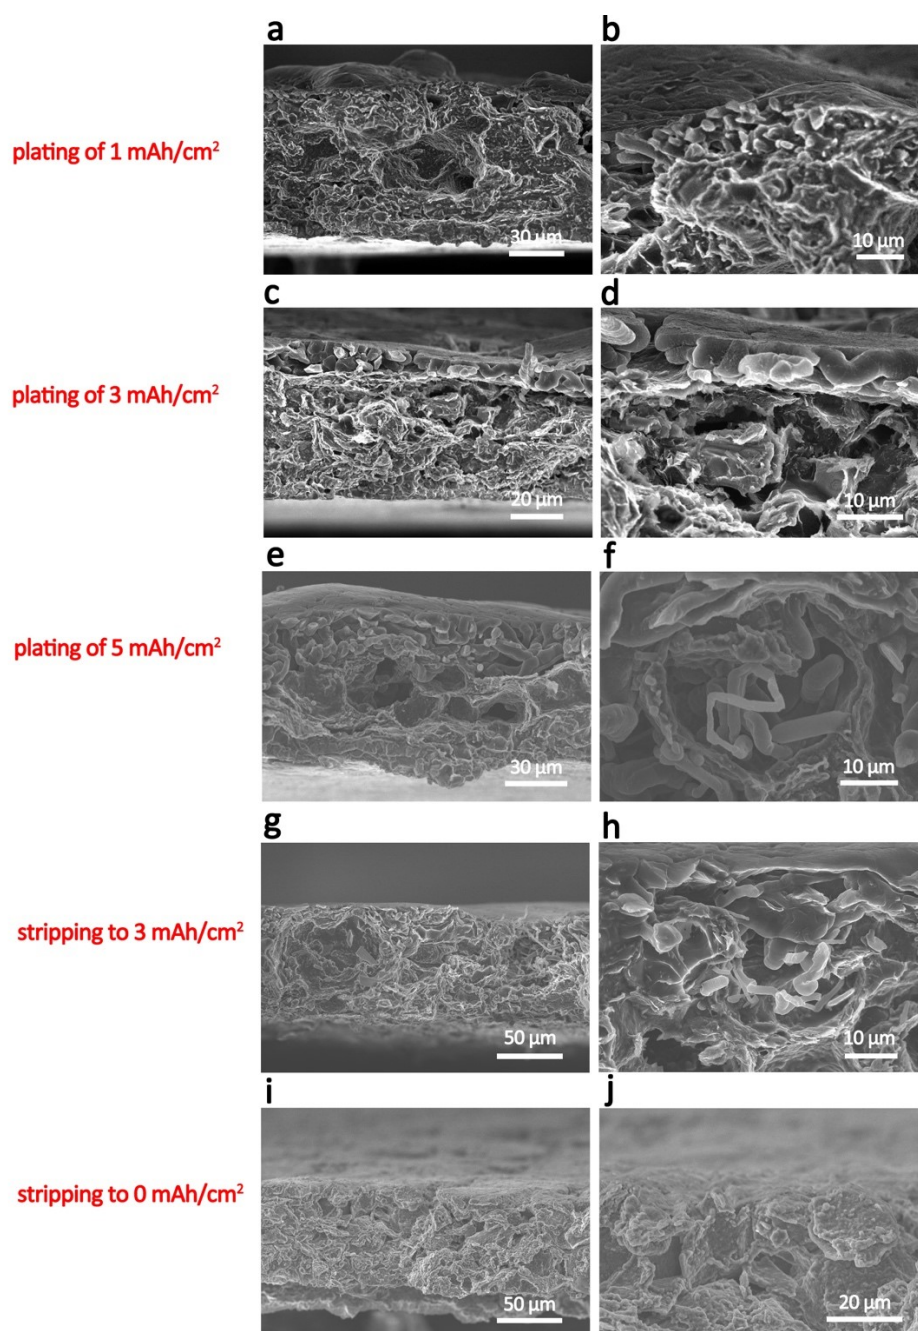

**Figure S9.** SEM images of Li@G anode with Li plating capacity of (a, b) 1 mAh cm<sup>-2</sup>, (c, d) 3 mAh cm<sup>-2</sup> and (e, f) 5 mAh cm<sup>-2</sup>. SEM images of Li@G anode when stripped with a capacity of (g, h) 2 mAh cm<sup>-2</sup> and (i, j) 5 mAh cm<sup>-2</sup>.

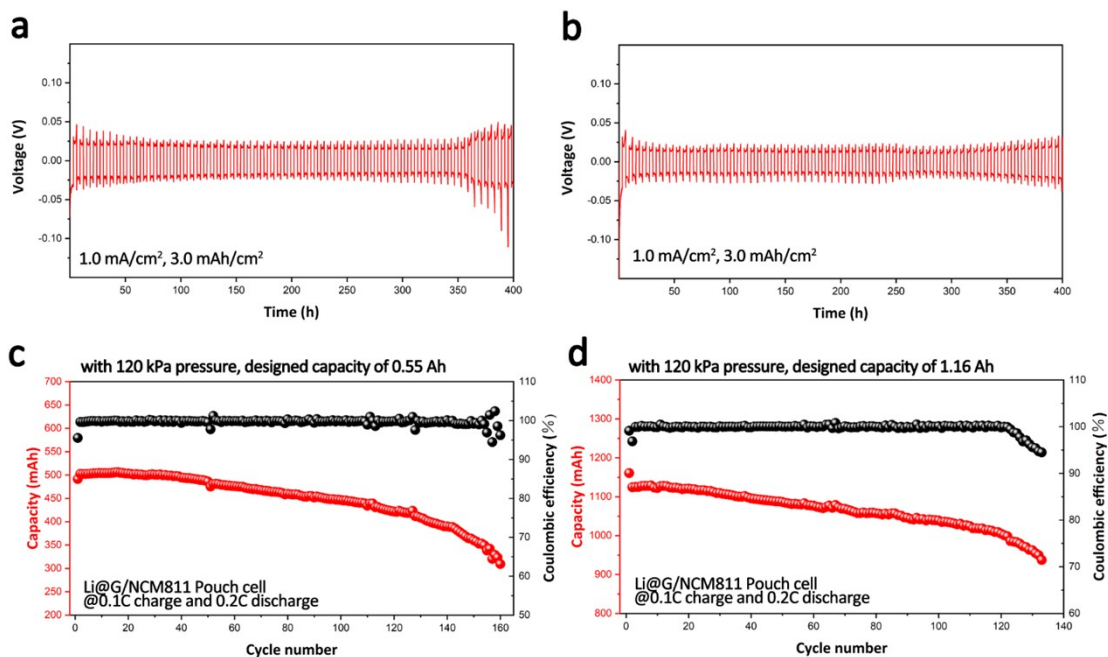

**Figure S10.** (a, b) Galvanostatic cycling performances of symmetric cells using the Li@G electrodes at a current density of 1.0 mA/cm<sup>2</sup> and a stripping/plating capacity of 3.0 mAh/cm<sup>2</sup>. Discharge capacity and Coulombic efficiency of (c) 0.55 Ah and (d) 1.16 Ah pouch cells using Li@G anodes at 0.1 C charge rate and 0.2 C discharge rate.



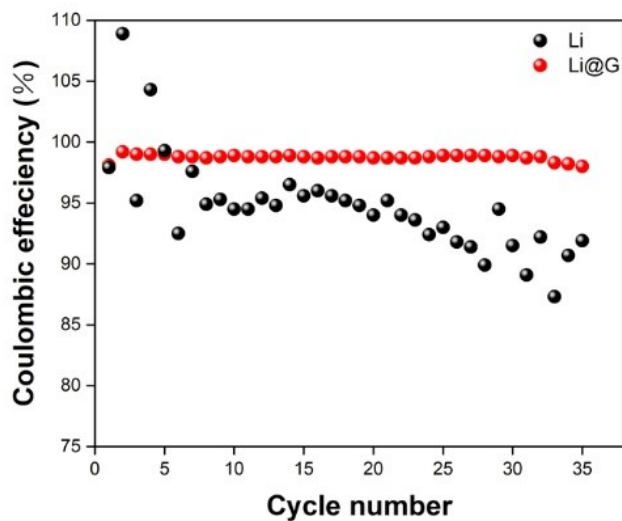

**Figure S11.** CE of Li-Cu half cells by using Li foil and Li@G as counter electrodes at a current density of 1.0 mA/cm<sup>2</sup> with an areal capacity of 3.0 mAh/cm<sup>2</sup>.

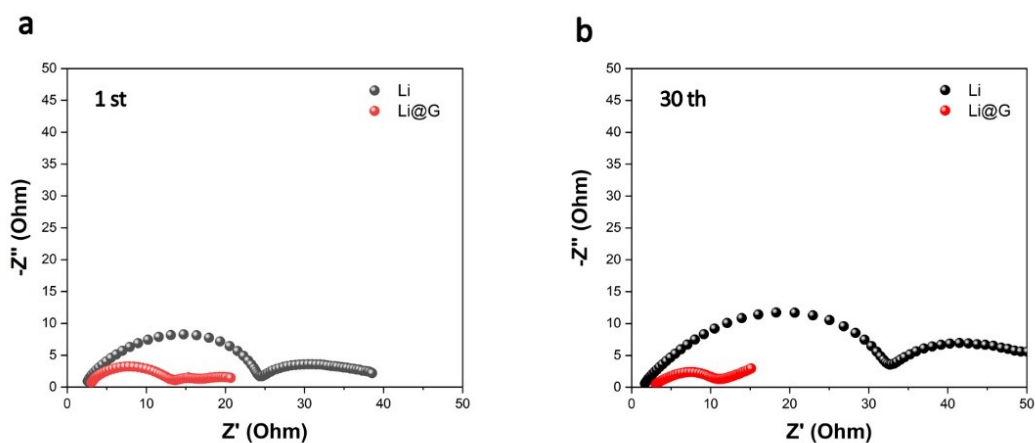

**Figure S12.** Nyquist plots for Li foil and Li@G symmetric cells (a) after the first cycle and (b) after 30 cycles.

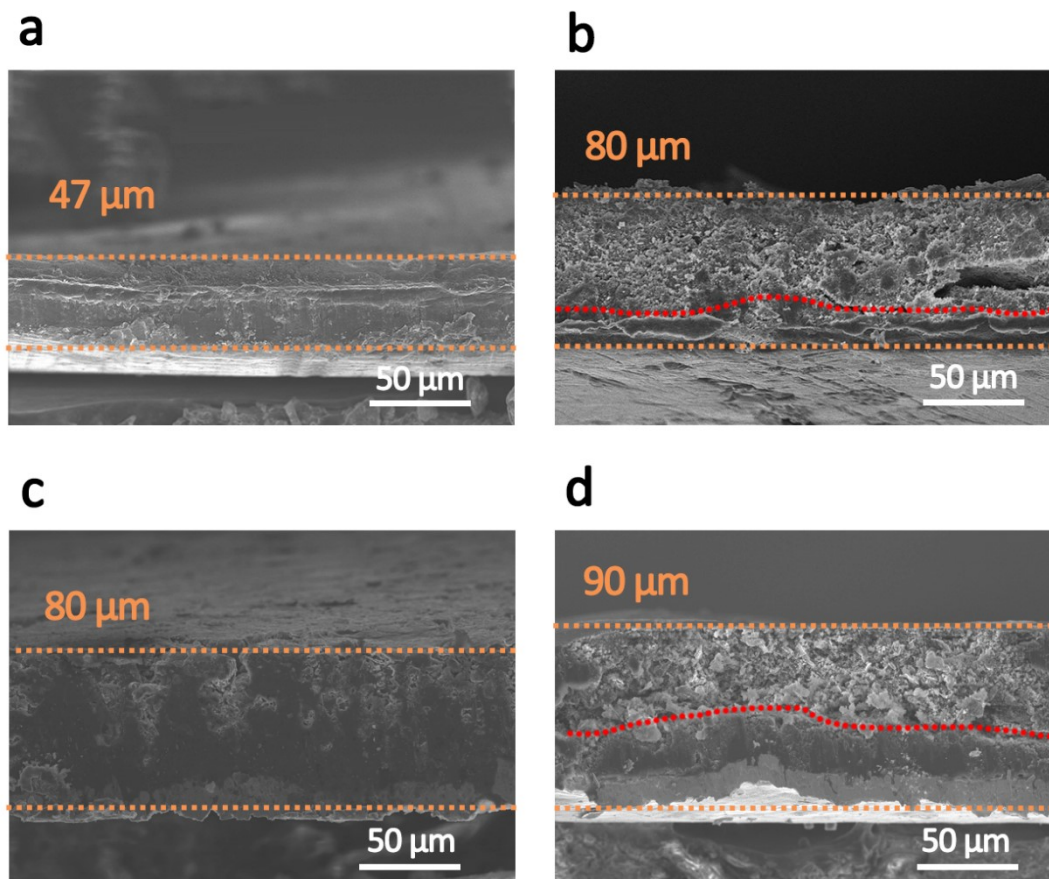

**Figure S13.** Cross-sectional SEM images of (a) pristine Li foil and (b) Li foil after 30 cycles in symmetric cells tested under an areal capacity of 3.0 mAh/cm<sup>2</sup>. Cross-sectional SEM images of (c) pristine Li@G anode and (d) Li@G anode after 30 cycles in symmetric cells tested under an areal capacity of 3.0 mAh/cm<sup>2</sup>.

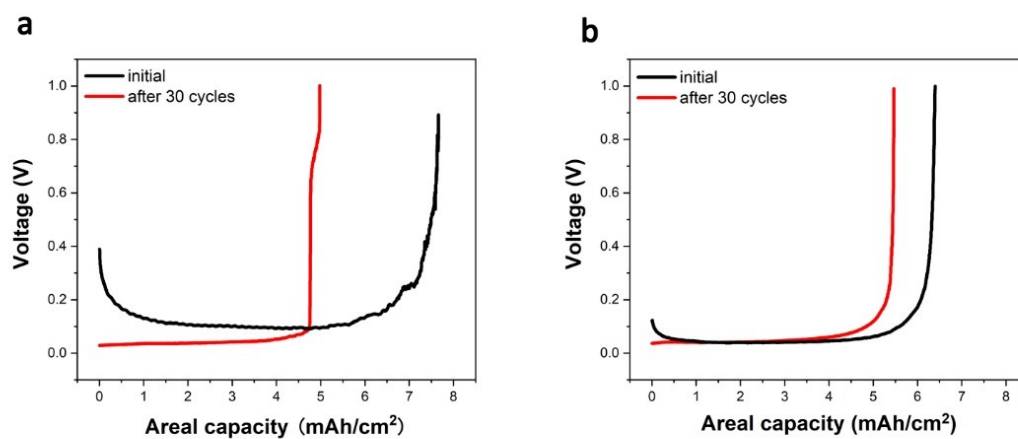

**Figure S14.** Electrochemical stripping curves of (a) Li foil and (b) Li@G electrode before and after 30 cycles at a current density of  $1.0 \text{ mA/cm}^2$  with an areal capacity of  $3.0 \text{ mAh/cm}^2$ .

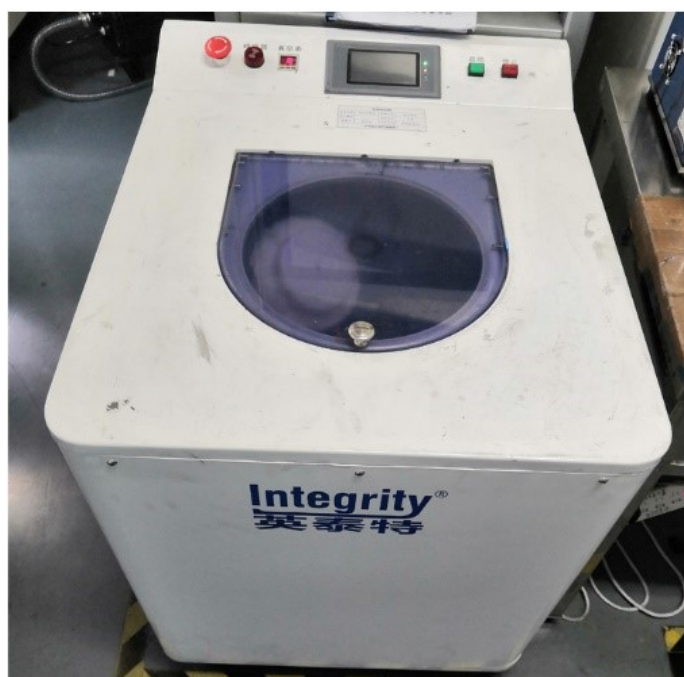

**Figure S15.** Optical photograph of the planetary rotary homogenizer.

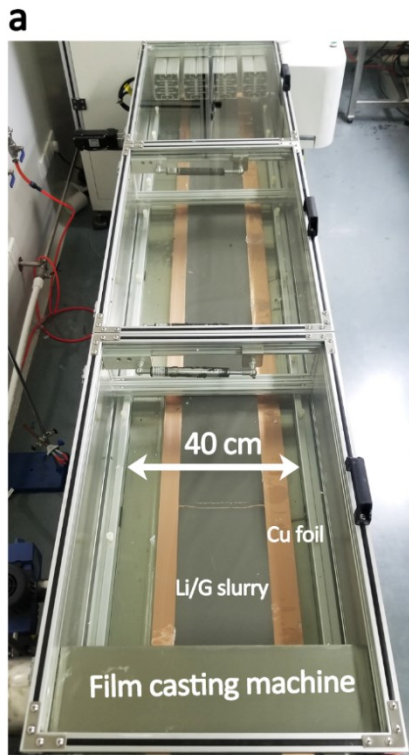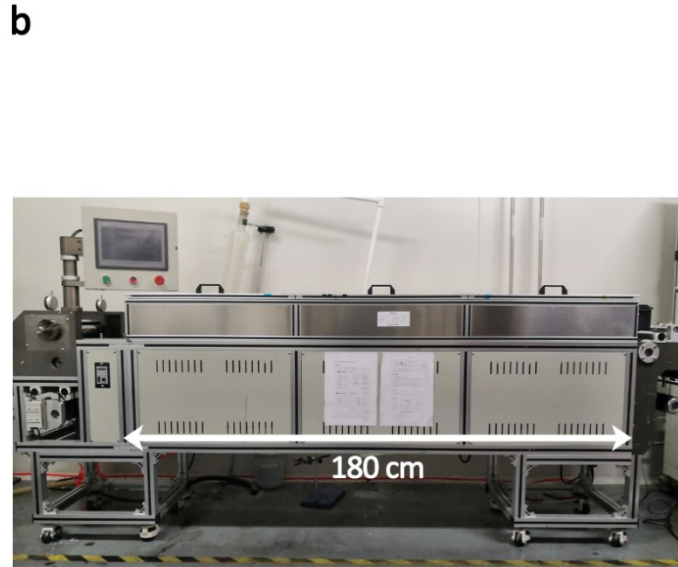

**Figure S16.** Photographs showing continuous casting of Li/G slurry using a coating-drying machine for the roll-to-roll preparation of Li/G foils.

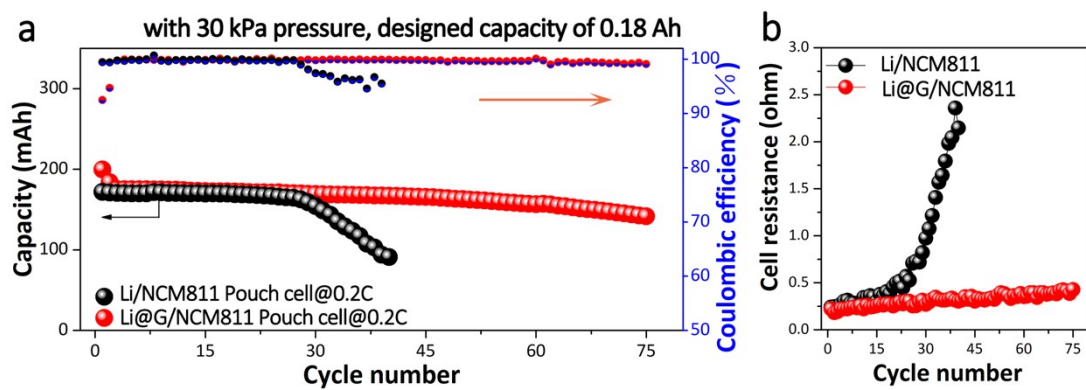

**Figure S17.** (a) Discharge capacity, Coulombic efficiency and (b) discharge cell resistance of 0.18 Ah pouch cells using Li@G anode and bare Li foil anode at 0.2 C rate.



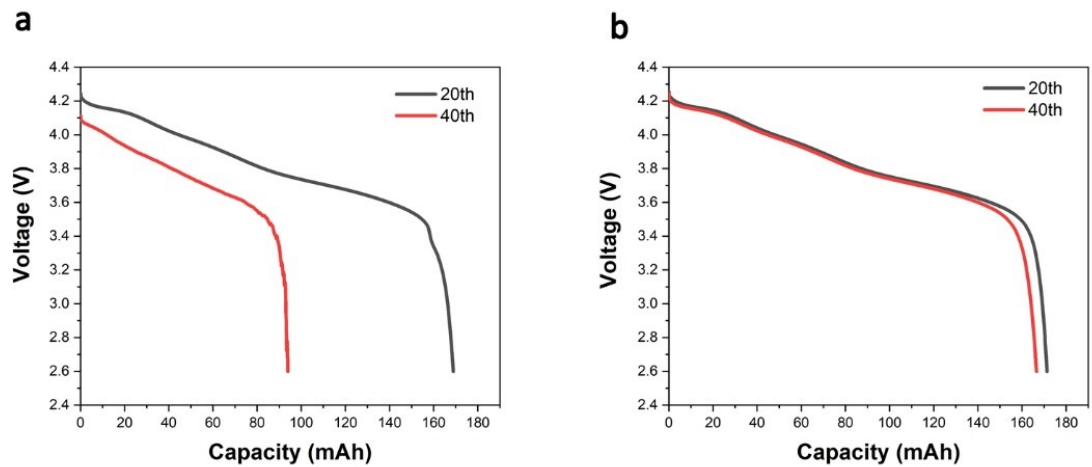

**Figure S18.** Discharge curves of (a) Li/NCM811 pouch cell and (b) Li@G/NCM811 pouch cell at the 20<sup>th</sup> cycle and the 40<sup>th</sup> cycle.

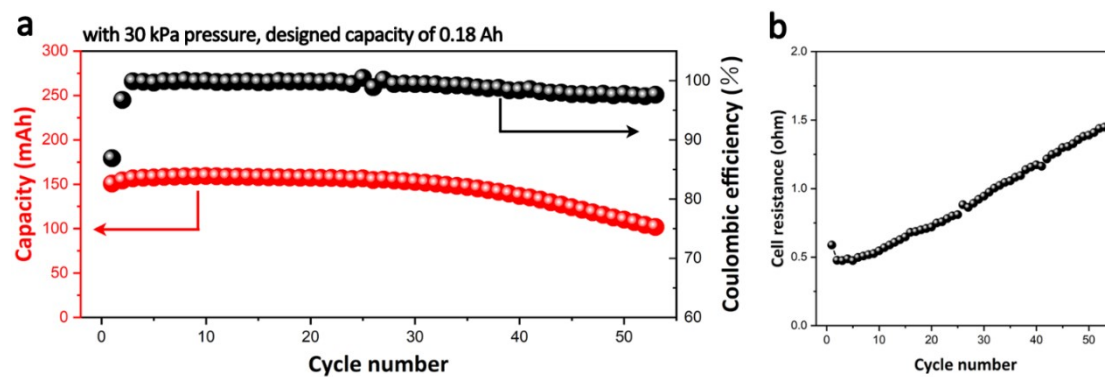

**Figure S19.** (a) Discharge capacity and Coulombic efficiency, and (b) discharge cell resistance of commercial Li metal laminated on Cu foil at rate of 0.2 C in 0.2 Ah Li@Cu/NCM811 pouch cell.

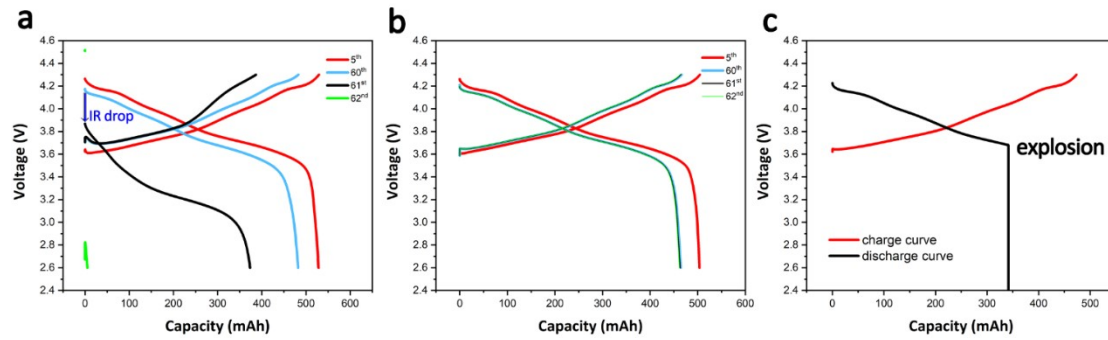

**Figure S20.** Charge and discharge curves of (a) Li/NCM811 pouch cell and (b) Li@G/NCM811 pouch cell at the 5<sup>th</sup>, 60<sup>th</sup>, 61<sup>st</sup> and 62<sup>nd</sup> cycle. (c) Typical charge and discharge curves of short circuit cells. During practical testing, the shorting of cell will cause sudden drop of voltage to zero and may result in explosion of lithium metal pouch cells, which is not observed in our experiments (Figure S20c). Moreover, the data of cell resistance and the variation of pressure curves in the main text and supporting information firmly manifest that “dead Li” layer is the main cause of the cell failure.

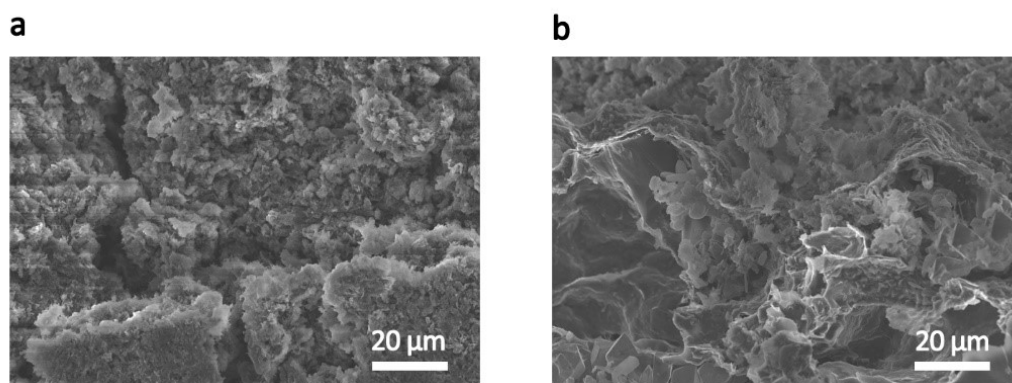

**Figure S21.** Magnified SEM images of (a) “dead Li” and (b) “dead Li” contacting with the LiC<sub>6</sub> skeleton in the Li@G anode.

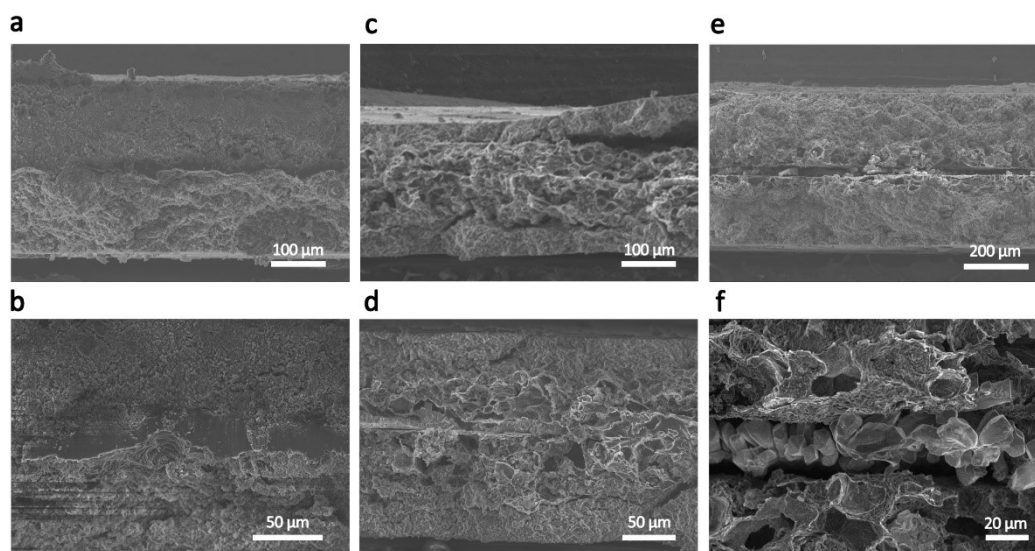

**Figure S22.** Original SEM images of Figure 5b-c, e-f, h-i.

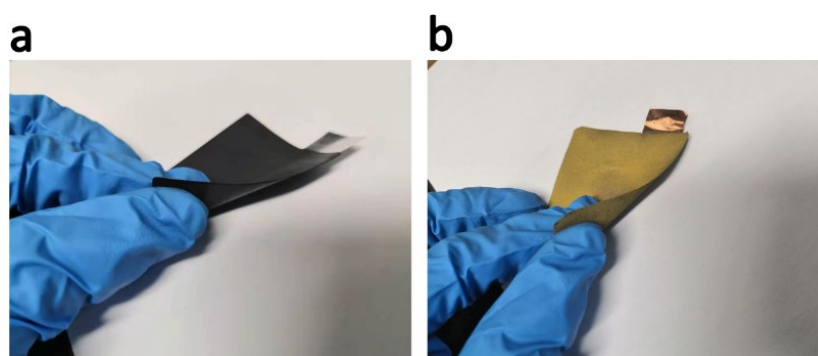

**Figure S23.** Digital photographs of the cathode (a) and anode with active materials on double sides (b).

**Table S1.** The comparison on vital parameters of Li metal cells in this work and previously reported works.

|                  | Energy density (Wh/k) | Capacity (Ah) | Life       | Electrolyte Injection (g/Ah) | cathode/ Areal loading (mg cm <sup>-2</sup> ) | areal capacity (mAh cm <sup>-2</sup> ) | N/P         | Cell type                    | Reference ID                               |
|------------------|-----------------------|---------------|------------|------------------------------|-----------------------------------------------|----------------------------------------|-------------|------------------------------|--------------------------------------------|
| <b>This work</b> | <b>356</b>            | <b>2.62</b>   | <b>100</b> | <b>3.0</b>                   | <b>NCM811/ 20.0</b>                           | <b>3.80</b>                            | <b>2.11</b> | <b>Pouch cell</b>            |                                            |
| Ref.1            | 294                   | 0.196         | 200        | -                            | NCM811/ 22.48                                 | 4.1                                    | 7.9         | Pouch cell                   | Science Advances 2019, 5 (10). eaax5587    |
| Ref.2            | 300                   | 1             | 160        | 2.7                          | NCM523/ 22.0                                  | 3.38                                   | 2.96        | Pouch cell                   | Adv. Energy Mater. 2020, 10, 1903362       |
| Ref.3            | 300                   | 2.08          | 120        | -                            | S/7.0                                         | 4.7                                    | -           | Pouch cell                   | Energy Storage Materials 2019, 18, 414-422 |
| Ref.4            | 371                   | 0.207         | 150        | 2.9                          | NCM811/ 21.8                                  | 3.93                                   | 1.45<br>5   | Pouch cell                   | Energy Storage Materials 2020, 26, 73-82   |
| Ref.5            | 340                   | 3.5           | 60         | 2.3                          | NCM523/ 25.5                                  | 4.46                                   | 1.6         | Pouch cell                   | Angewandte Chemie 2020, 59 (8), 3252-3257  |
| Ref.6            | 405                   | 0.1           | 200        | -                            | LiFMP/-                                       | -                                      | -           | solid-state lithium batterie | Nano Energy 2016, 28, 447-454              |



**Table S2.** The comparisons on Li metal composite anode with different conductive materials prepared by melting/infusion or electrochemical deposition methods and characterized in coin cells or pouch cells.

|                  | Material selection  | Preparation method                  | Controllable lithium content | Scalable fabrication | Cathode/ Areal loading                                                                                    | Cycle life (cycle number-retention) | Cell type         | Reference ID                                             |
|------------------|---------------------|-------------------------------------|------------------------------|----------------------|-----------------------------------------------------------------------------------------------------------|-------------------------------------|-------------------|----------------------------------------------------------|
| Ref.7            | carbon fibers       | rolling method                      | ×                            | -                    | S/<br>1.7 mg cm <sup>-2</sup>                                                                             | 100-98%                             | Pouch Cell        | Advanced Materials 2019, 31 (8), e1807131                |
| Ref.8            | carbon felt         | thermal infusion                    | ×                            | ×                    | S/<br>2.45 mg cm <sup>-2</sup>                                                                            | 400-63.8%                           | Coin cell         | Nano Energy 2019, 60, 257-266                            |
| Ref.9            | carbon paper        | electrodeposited                    | √                            | ×                    | LiNi <sub>0.8</sub> Co <sub>0.15</sub> Al <sub>0.05</sub> O <sub>2</sub> /<br>4.0-5.0 mg cm <sup>-2</sup> | 200-82.5%                           | Coin cell         | ACS Appl Mater Interfaces 2018, 10 (41), 35296-35305     |
| Ref.10           | hollow carbon fiber | electrodeposited                    | √                            | ×                    | LiFePO <sub>4</sub> /<br>13.0 mg cm <sup>-2</sup>                                                         | 200-91.3%                           | Coin cell         | Joule 2017, 1 (3), 563-575                               |
| Ref.11           | carbon fibers       | thermal infusion                    | ×                            | ×                    | S/<br>1.7 mg cm <sup>-2</sup>                                                                             | 400-64.3%                           | Coin cell         | Joule 2018, 2 (4), 764-777                               |
| Ref.12           | Cu mesh             | melt infusion                       | ×                            | ×                    | LiFePO <sub>4</sub> /<br>2.0 mg cm <sup>-2</sup>                                                          | 1000-77.6%                          | Coin cell         | Journal of Materials Chemistry A 2019, 7 (10), 5726-5732 |
| Ref.13           | Cu mesh             | mechanical pressure                 | ×                            | -                    | LTO/<br>-                                                                                                 | 500-79.7%                           | Coin cell         | Adv. Funct. Mater. 2017, 27, 1606422                     |
| <b>This work</b> | <b>graphene</b>     | <b>Thermal-initiated Conversion</b> | √                            | √                    | <b>NCM811/<br/>20.0 mg cm<sup>-2</sup></b>                                                                | <b>100-75%</b>                      | <b>Pouch cell</b> |                                                          |

**Table S3.** Detailed parameters of the pouch cell.

| <b>Components</b>      | <b>Value (g)</b> |
|------------------------|------------------|
| Li@G anodes            | 1.788            |
| NCM811 cathodes        | 14.526           |
| Separator              | 1.872            |
| Tabs                   | 0.6              |
| Electrolyte            | 7.8              |
| Al-plastic film        | 1.2              |
| <b>Total</b>           | <b>27.786</b>    |
| <b>Capacity</b>        | <b>2.62 Ah</b>   |
| <b>Average voltage</b> | <b>3.8 V</b>     |
| <b>Energy density</b>  | <b>356 Wh/kg</b> |
